# Supplementary material
Source: Elsevier journal article supplement (https://www.sciencedirect.com/science/article/pii/S188898911730068X)
Supplement: mmc1 [file S188898911730068X:mmc1.docx]

**Figura Suplementaria 1:** Procedimiento de reclutamiento de los pacientes con TB y TDMR de las 100 familias múltiples


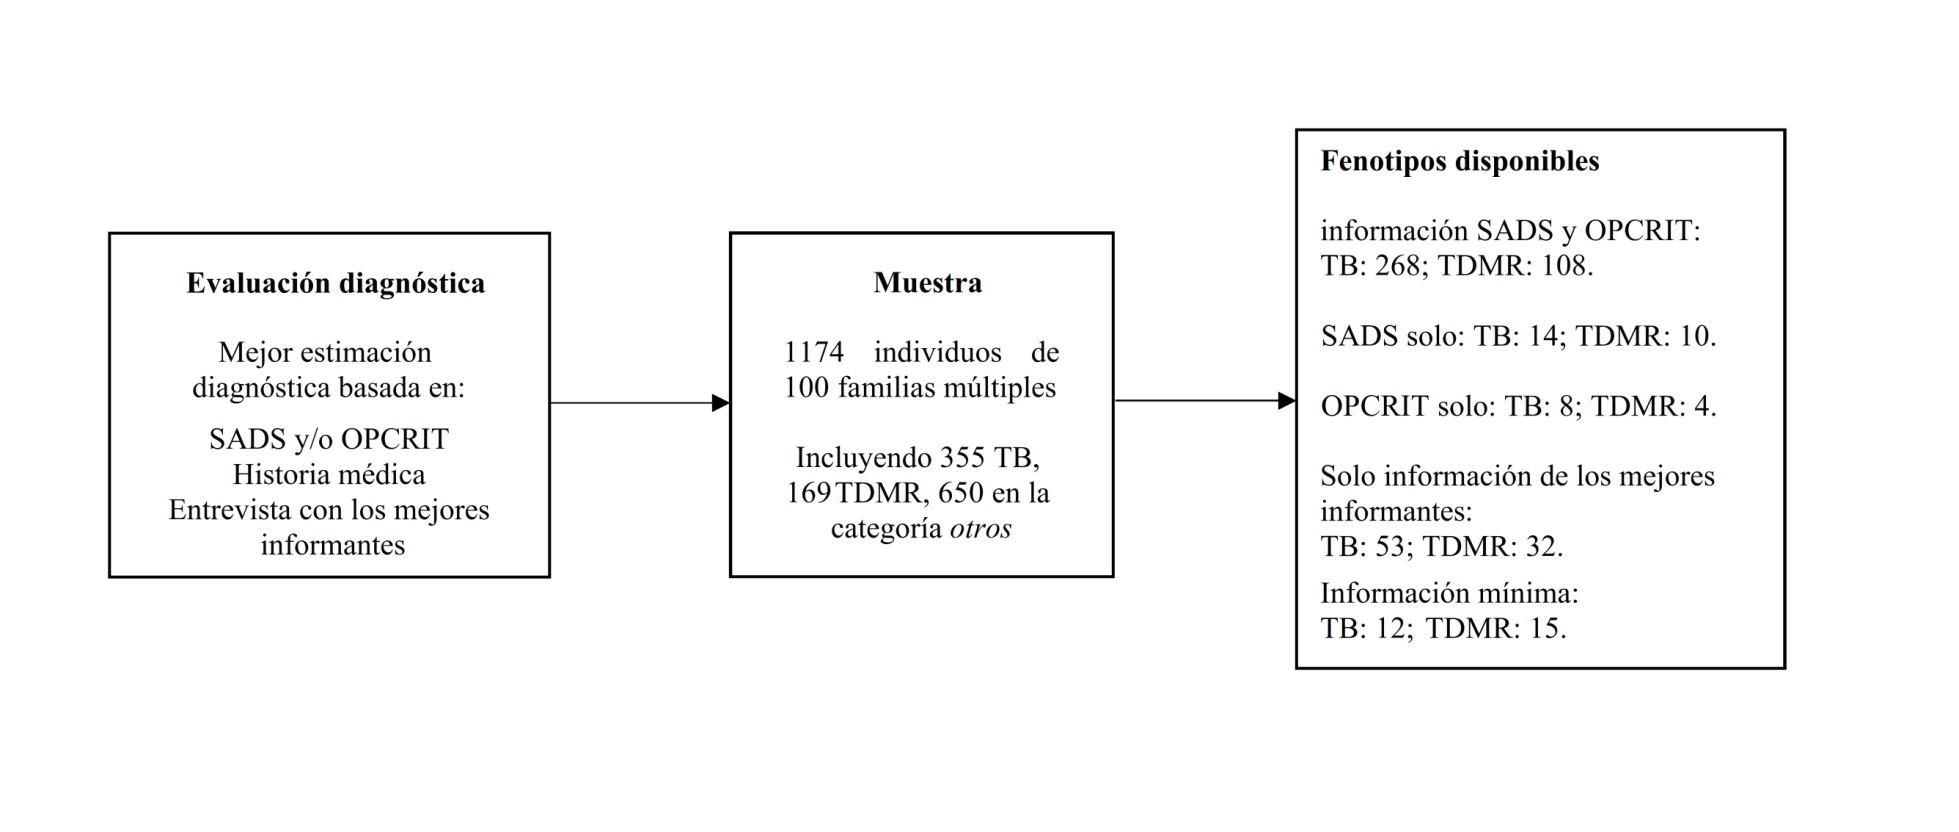


* TB = Categoría Trastorno Bipolar: Trastorno Bipolar I (N = 258), Trastorno Bipolar II (N = 78), Trastorno Bipolar no Especificado (N = 18), Trastorno Esquizoafectivo Tipo Bipolar (N = 1); TDMR = Trastorno Depresivo Mayor Recurrente; Otros: Trastorno Depresivo Mayor Episodio Único (N = 35), Trastorno Depresivo Mayor no Especificado (N = 12), Abuso o Dependencia de Alcohol y Drogas (N = 31), Esquizofrenia (N = 2), Agorafobia (N = 1) y Sanos (N = 569).

**Tabla Suplementaria 1:** Número total de pedigríes y número de pacientes con TB (TB-I, TB-II, TB-NE, SCA-B) y TDMR por pedigrí.

| Número de pedigríes por provincia | Nº de individuos | Nº de individuos afectados |
| --- | --- | --- |
| 29 familias de Málaga | 54 | 27 |
| 37 | 18 |
| 34 | 15 |
| 24 | 6 |
| 22 | 17 |
| 17 | 9 |
| 16 | 9 |
| 15 | 9 |
| 15 | 9 |
| 14 | 5 |
| 14 | 4 |
| 13 | 8 |
| 13 | 5 |
| 13 | 4 |
| 12 | 5 |
| 11 | 4 |
| 10 | 7 |
| 10 | 5 |
| 10 | 5 |
| 10 | 5 |
| 9 | 6 |
| 8 | 5 |
| 8 | 5 |
| 8 | 4 |
| 8 | 2 |
| 6 | 3 |
| 5 | 4 |
| 5 | 4 |
| 4 | 2 |
| 15 familias de Granada | 22 | 12 |
| 21 | 10 |
| 20 | 7 |
| 18 | 7 |
| 15 | 6 |
| 14 | 6 |
| 14 | 5 |
| 10 | 7 |
| 10 | 4 |
| 10 | 4 |
| 9 | 4 |
| 8 | 4 |
| 7 | 5 |
| 7 | 2 |
| 5 | 4 |
| 29 familias de Córdoba | 23 | 6 |
| 17 | 9 |
| 17 | 8 |
| 16 | 7 |
| 15 | 7 |
| 15 | 7 |
| 14 | 5 |
| 14 | 5 |
| 11 | 5 |
| 11 | 4 |
| 11 | 4 |
| 11 | 2 |
| 10 | 6 |
| 10 | 4 |
| 9 | 5 |
| 9 | 4 |
| 9 | 3 |
| 8 | 4 |
| 8 | 3 |
| 8 | 2 |
| 8 | 2 |
| 7 | 5 |
| 7 | 3 |
| 6 | 2 |
| 6 | 2 |
| 6 | 2 |
| 5 | 2 |
| 3 | 2 |
| 3 | 1 |
| 18 familias de Jaén | 30 | 11 |
| 18 | 9 |
| 15 | 7 |
| 13 | 4 |
| 12 | 4 |
| 11 | 5 |
| 11 | 5 |
| 11 | 4 |
| 11 | 3 |
| 11 | 2 |
| 11 | 2 |
| 10 | 4 |
| 10 | 4 |
| 10 | 3 |
| 9 | 4 |
| 9 | 2 |
| 8 | 1 |
| 7 | 2 |
| 9 familias de Cádiz | 12 | 7 |
| 10 | 4 |
| 8 | 5 |
| 3 | 3 |
| 3 | 2 |
| 3 | 2 |
| 2 | 2 |
| 2 | 2 |
| 2 | 2 |

**Tabla Suplementaria 2:** Diferencias en las características clínicas y de tratamiento entre los pacientes de la cohorte original con TB (TB-I, TB-II, TB-NE, SCA-B) y TDMR.

| Características clínicas y de tratamiento | TB  Ntotal=355  M (DT) | TDMR  Ntotal=169  M (DT) | T de student  o  Mann Whitney/*p* |
| --- | --- | --- | --- |
| **A lo largo de la vida**  Edad en el primer tratamiento (N=362)  Edad de la primera hospitalización (N=140)  Número de intentos de suicidio (N=93)  **Episodios depresivos**  Edad en el primer episodio (N=462) | 27.07 (11.1)  30.16 (12.0)  1.88 (1.4)  24.71 (11.7) | 34.64 (13.6)  28.60 (11.0)  1.46 (1.1)  29.17 (15.3) | -4.78/<.001  -0.17/.862  -1.37/.171  -2.91/.004 |
| Características clínicas y de tratamiento | TB  N (%) | TDMR  N (%) | Chi Cuadrado/p |
| **A lo largo de la vida**  Tratamiento continuado previo (N=484)  Hospitalización (N=524)  Duración de la hospitalización > 3meses (N=144)  Abuso de alcohol (N=524)  Abuso de drogas (N=524)  Personalidad ciclotímica (N=524)  Intento de suicidio (N=524)  Incapaz de trabajar por >= 6 meses en los 5 años anteriores debido a problemas psicológicos (N= 500) | 243 (73.2)  149 (42.1)  65 (47.4)  34 (9.6)  22 (6.2)  34 (9.6)  80 (22.6)  109 (32.0) | 83 (54.6)  9 (5.3)  2 (28.6)  8 (4.7)  6 (3.5)  13 (7.6)  13 (7.5)  34 (21.4) | 16.38/<.001  73.83/<.001  0.95/.329  3.74/.053  1.64/.201  0.54/.463  17.59/<.001  46.20/<.001 |
| **Episodios depresivos**  >4 episodios (N=519)  Episodio más largo (>3 meses) (N=502)  Hospitalización (N=508)  Medicación (N=510)  TEC (N=507)  Intento de suicidio (N=506)  Alucinaciones (N=508)  Delirios (N=508) | 268 (76.1)  314 (93.5)  52 (15.3)  306 (90.0)  10 (3.0)  66 (19.5)  28 (8.3)  37 (10.9) | 122 (72.6)  145 (87.3)  8 (4.7)  149 (87.6)  5 (3.0)  14 (8.3)  8 (4.7)  6 (3.6) | 0.75/.386  5.28/.022  12.18/<.001  0.65/.419  0/1  10.56/ .001  2.13/.145  7.89/.005 |
| **Episodios maniacos**  >4 episodios (N=351)  Episodio más largo (>1 mes) (N=267)  Hospitalización (N=267)  Medicación (N=267)  Intento de suicidio (N=265)  Alucinaciones (N=266)  Delirios (N=267) | 172 (48.7)  135 (40.6)  123 (46.1)  242 (90.6)  14 (5.3)  18 (6.8)  208 (77.9) |  |  |

Nota. TB: Trastorno Bipolar; TDMR: Trastorno Depresivo Mayor Recurrente; M: Media; DT: Desviación Típica; TEC: Terapia Electro-Convulsiva.

**Información suplementaria:**

**Análisis de las dimensiones de síntomas clínicos Manía/Excitación, Depresión, Desorganización, Síntomas Positivos, Síntomas negativos en los sujetos de la cohorte original**

Las 5 dimensiones *Manía/Excitación, Depresión, Desorganización, Síntomas Positivos, Síntomas negativos* en los sujetos de la cohorte original se generaron a partir del *OperationalCriteriaChecklistforPsychoticIllness* (OPCRIT)1. Estas cinco dimensiones sintomáticas fueron seleccionadas al ser las más frecuentemente informadas en la literatura2-10. Para cada dimensión sintomática, se seleccionaron los ítems del OPCRIT con cargas factoriales > 0.30 en más del 50% de los análisis factoriales consultados. Los ítems seleccionados del OPCRIT por cada dimensión aparecen en la Tabla Suplementaria 3. Todos los ítems del OPCRIT fueron dicotomizados y sumados separadamente para cada dimensión. Los datos perdidos fueron imputados asumiendo lo que > 50% de los sujetos con el mismo diagnóstico puntuaron en ese ítem. Los resultados no variaron significativamente entre los datos imputados y los originales. La puntuación sumada por cada dimensión fue multiplicada por 1011. Los resultados se muestran en la Tabla Suplementaria 3.

**Bibliografía**

1. McGuffin P, Farmer A, Harvey I. A polydiagnostic application of operational criteria in studies of psychotic illness. Development and reliability of the OPCRIT system. Arch Gen Psychiatry. 1991;48:764–70.

2. Allardyce J, McCreadie RG, Morrison G, van Os J. Do symptom dimensions or categorical diagnoses best discriminate between known risk factors for psychosis? Soc Psychiatry Psychiatr Epidemiol. 2007;42:429–37.

3. Brittain PJ, Lobo SEM, Rucker J, et al. Harnessing clinical psychiatric data with an electronic assessment tool (OPCRIT+): The utility of symptom dimensions. PLoS One. 2013;8(3):e58790.

4. Cardno AG, Jones L a., Murphy KC, et al. Factor analysis of schizophrenic symptoms using the OPCRIT checklist. Schizophr Res. 1996;22(3):233–9.

5. Maciukiewicz M, Czerski PM, Leszczynska-Rodziewicz A, et al. Analysis of OPCRIT results indicate the presence of a novel “social functioning” domain and complex structure of other dimensions in the Wielkopolska (Poland) population. Schizophr Res. 2012;138:223–32.

6. Matsuura M, Adachi N, Oana Y, et al. A polydiagnostic and dimensional comparison of epileptic psychoses and schizophrenia spectrum disorders. Schizophr Res. 2004;69:189–201.

7. McIntosh a M, Forrester a, Lawrie SM, et al. A factor model of the functional psychoses and the relationship of factors to clinical variables and brain morphology. Psychol Med. 2001;31:159–71.

8. Miró X, Ph D, Meier S, et al. Studies in humans and mice implicate Neurocan in the etiology of mania. Am J Psychiatry. 2012;(September):982–90.

9. Rosenman S, Korten A, Medway J, Evans M. Characterising psychosis in the Australian National Survey of Mental Health and Wellbeing Study on Low Prevalence (psychotic) Disorders. Aust N Z J Psychiatry. 2000;34:792–800.

10. Serretti A, Macciardi F, Smeraldi E. Identification of symptomatologic patterns common to major psychoses: Proposal for a phenotype definition. Am J Med Genet. 1996;67(4):393–400.

11. Serretti A, Mandelli L, Lattuada E, Cusin C, Smeraldi E. Clinical and demographic features of mood disorder subtypes. Psychiatry Res. 2002;112:195–210.

**Tabla Suplementaria 3:** Diferencias de medias en las dimensiones seleccionadas del OPCRIT entre TB (TB-I, TB-II, TB-NE, SCA-B) y TDMR.

| Síntomas a lo largo de la vida (OPCRIT) | TB  (Ntotal=276)  M (DT) | TDMR  (Ntotal=112)  M (DT) | Mann Whitney/*p* |
| --- | --- | --- | --- |
| Excitación/Manía | 8.555 (1.378) | 0.089 (0.834) | -16.12/<.001 |
| Actividad excesiva | 0.899 (0.302) | 0.009 (0.945) | -16.54/<.001 |
| Actividad imprudente | 0.221 (0.417) | 0 | -5.41/<.001 |
| Distracción | 0.898 (0.302) | 0.009 (0.094) | -16.54/<.001 |
| Necesidad reducida de dormir | 0.942 (0.234) | 0.018 (0.133) | -17.59/<.001 |
| Presión del habla | 0.971 (0.168) | 0.009 (0.094) | -18.56/<.001 |
| Pensamientos apresurados | 0.942 (0.235) | 0.009 (0.094) | -17.72/<.001 |
| Ánimo elevado | 0.978 (0.146) | 0.009 (0.094) | -18.89/<.001 |
| Autoestima aumentada | 0.993 (0.085) | 0.009 (0.094) | -19.27/<.001 |
| Depresión | 8.967 (1.902) | 8.199 (1.004) | -8.824/<.001 |
| Disforia | 0.956 (0.204) | 0.964 (0.186) | -0.348/.728 |
| Ideación de suicidio | 0.818 (0.385) | 0.714 (0.454) | -2.283/.022 |
| Pérdida de energía | 0.960 (0.196) | 1 (0) | -2.141/.032 |
| Pérdida de placer | 0.942 (0.234) | 0.982 (0.133) | -1.700/.089 |
| Concentración pobre | 0.927 (0.260) | 0.964 (0.186) | -1.136/.174 |
| Autorreproche excesivo | 0.822 (0.382) | 0.741 (0.440) | -2.279/.070 |
| Líbido disminuida | 0.942 (0.234) | 0.929 (0.259) | 0.498/.618 |
| Enlentecimiento | 0.956 (0.204) | 1(0) | -2.339/.025 |
| Variación del humor diurno | 0.692 (0.462) | 0.661 (0.476) | -0.600/.549 |
| Insomnio inicial | 0.935 (0.247) | 0.982 (0.133) | -1.909/.056 |
| Despertar temprano | 0.906 (0.293) | 0.018 (0.133) | -16.589/<.001 |
| Apetito pobre | 0.902 (0.298) | 0.884 (0.322) | -0.535/.593 |
| Síntomas positivos | 0.356 (0.873) | 0.089 (0.414) | -3.106/.002 |
| Delirios persecutorios | 0.098 (0.298) | 0.036 (0.186) | -2.042/.041 |
| Alucinaciones auditivas en tercera persona | 0.025 (0.157) | 0 | -1.669/.089 |
| Inserción del pensamiento | 0 | 0 |  |
| Delirios de influencia | 0.054 (0.227) | 0.009 (0.094) | -2.036/.042 |
| Delirios de pasividad | 0 | 0 |  |
| Desorganización | 0.027 (0.300) | 0 (0) | -1.106/.269 |
| Discurso difícil de entender | 0.007 (0.085) | 0 | -0.902/.367 |
| Trastorno del pensamiento formal positivo | 0.004 (0.060) | 0 | -0.637/.524 |
| Afecto inapropiado | 0 | 0 |  |
| Conducta bizarra | 0 | 0 |  |
| Síntomas negativos | 0.023 (0.072) | 0.002 (0.033) | -2.548/.011 |
| Trastorno del pensamiento formal negativo | 0 | 0 |  |
| Afecto restringido | 0.091 (0.287) | 0.018 (0.133) | -2.548/.011 |
| Embotamiento afectivo | 0 | 0 |  |

Nota. TB: Trastorno Bipolar; TDMR: Trastorno Depresivo Mayor Recurrente; OPCRIT: *TheOperationalCriteriaChecklistforPsychoticIllness*; M: Media; DT:Desviación Típica. El rango de las puntuaciones es 0-10.
